# Supplementary material for: Ultrafast charge transfer and carrier dynamics in a WS2/MoSe2 few-layer van der Waals heterostructure
Source: Royal Society of Chemistry journal article supplement (doi:10.1039/d1tc05584d), 2022-01-01
Supplement: d1tc05584d1.pdf [file d1tc05584d1.pdf]

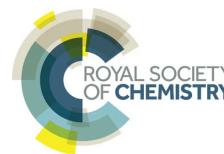

# Journal Name

## ARTICLE TYPE

Cite this: DOI: 10.1039/xxxxxxxxxx

## Electronic Supplementary Information: Ultrafast Charge Transfer and Carrier Dynamics in a WS<sub>2</sub>/MoSe<sub>2</sub> Few-Layer van der Waals Heterostructure

Ang Bian,<sup>a</sup> Shaohua Fu,<sup>a</sup> Pengzhi Wang,<sup>a</sup> Kun Zhao,<sup>a</sup> Jiaqi He,<sup>b</sup> Xiaoxian Zhang,<sup>a</sup> Dawei He,<sup>\*a</sup> Yongsheng Wang,<sup>\*a</sup> and Hui Zhao<sup>\*c</sup>

Received Date

Accepted Date

DOI: 10.1039/xxxxxxxxxx

[www.rsc.org/journalname](http://www.rsc.org/journalname)

<sup>a</sup> Key Laboratory of Luminescence and Optical Information, Ministry of Education, Institute of Optoelectronic Technology, Beijing Jiaotong University, Beijing 100044, China. E-mail: [dwhe@bjtu.edu.cn](mailto:dwhe@bjtu.edu.cn); [yshwang@bjtu.edu.cn](mailto:yshwang@bjtu.edu.cn)

<sup>b</sup> College of Mathematics and Physics, Beijing University of Chemical Technology, Beijing 100029, China

<sup>c</sup> Department of Physics and Astronomy, The University of Kansas, Lawrence, Kansas 66045, USA. E-mail: [huizhao@ku.edu](mailto:huizhao@ku.edu)

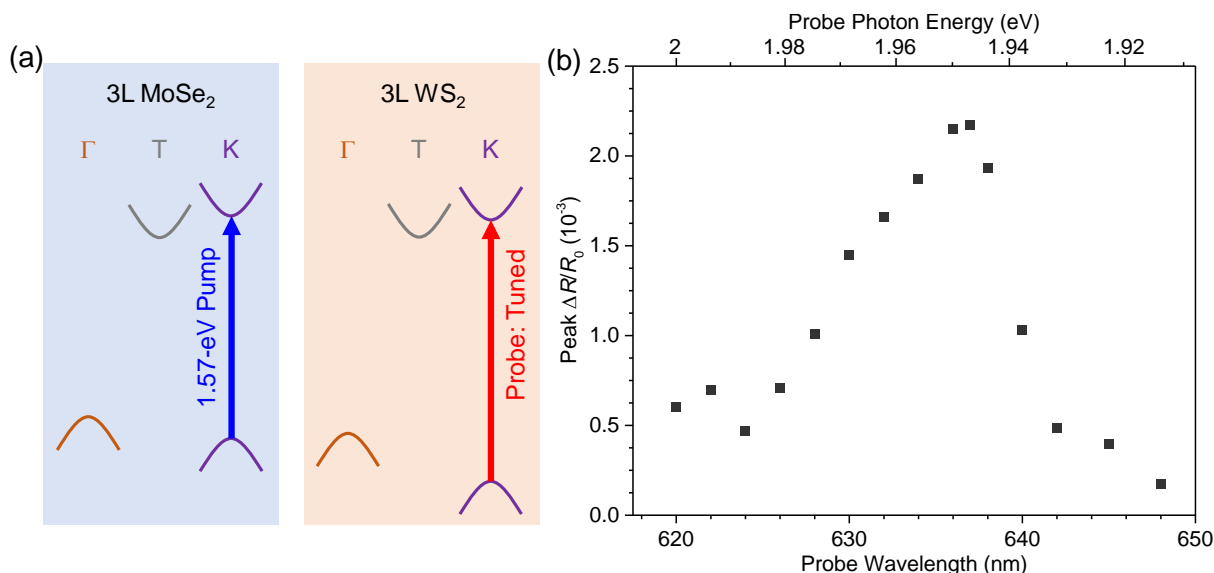

**Fig. ESI1** (a) Experimental configuration to study probe-wavelength dependence of the differential reflectance signal of the 3L-WS<sub>2</sub>/3L-MoSe<sub>2</sub> heterostructure. (b) Peak differential reflectance as a function of the probe wavelength with a 1.57-eV pump. The peak signal for each wavelength is obtained by choosing the probe delay that produces the maximal signal.

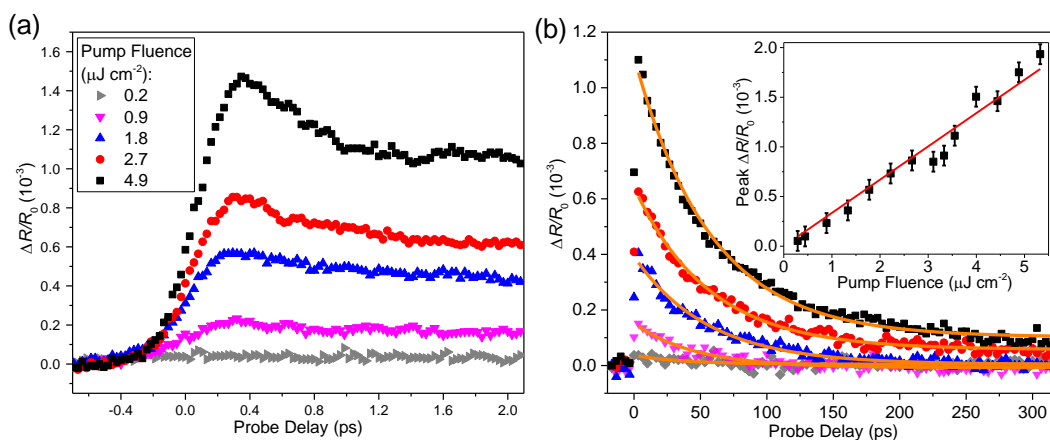

**Fig. ESI2** Differential reflectance of a 1.95-eV probe pulse measured from the 3L-WS<sub>2</sub>/3L-MoSe<sub>2</sub> heterostructure with a 1.57-eV pump pulse of various fluences as labeled. (a) and (b) show the signal on short- and long-time ranges, respectively. The orange curves are bi-exponential fits (see main text). The inset of (b) shows the linear relation between the peak signal and the pump fluence, which is obtained by choosing the probe delay that produces the maximal signal.

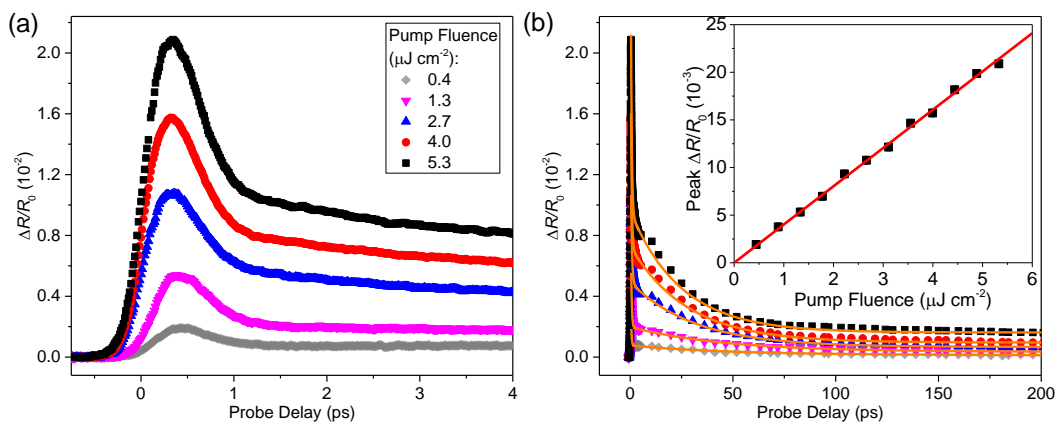

**Fig. ES13** Differential reflectance of a 1.95-eV probe pulse measured from the 3L-WS<sub>2</sub>/3L-MoSe<sub>2</sub> heterostructure with a 3.02-eV pump pulse of various fluences as labeled. (a) and (b) show the signal on short- and long-time ranges, respectively. The orange curves are bi-exponential fits (see main text). The inset of (b) shows the linear relation between the peak signal and the pump fluence, which is obtained by choosing the probe delay that produces the maximal signal.

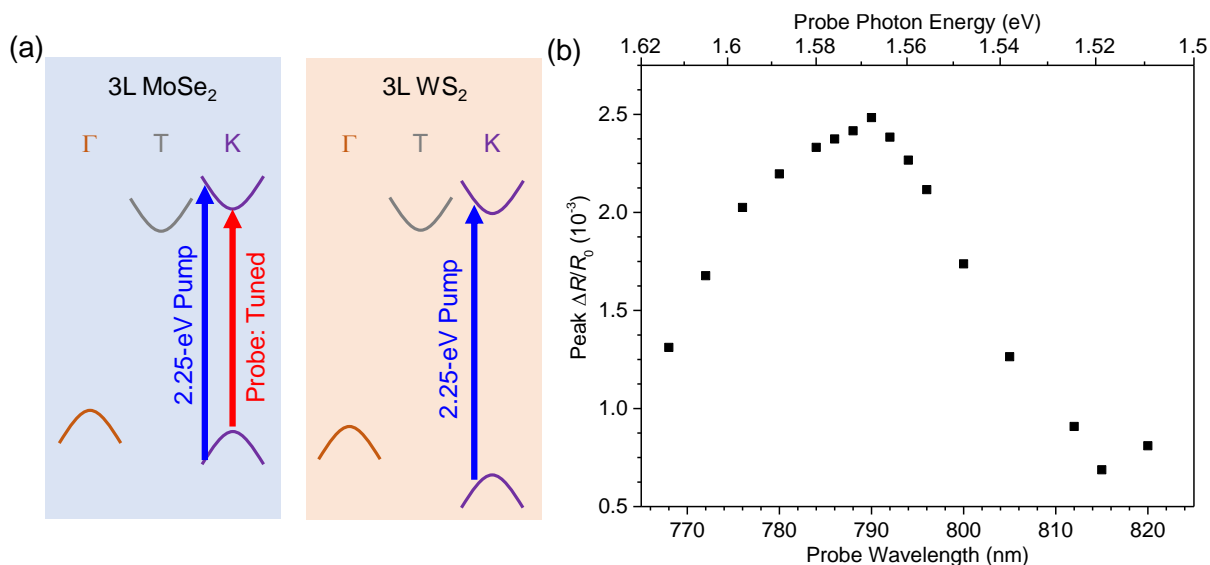

**Fig. ES14** (a) Experimental configuration to study probe-wavelength dependence of the differential reflectance signal of the 3L-WS<sub>2</sub>/3L-MoSe<sub>2</sub> heterostructure. (b) Peak differential reflectance as a function of the probe wavelength with a 2.25-eV pump. The peak signal for each wavelength is obtained by choosing the probe delay that produces the maximal signal.

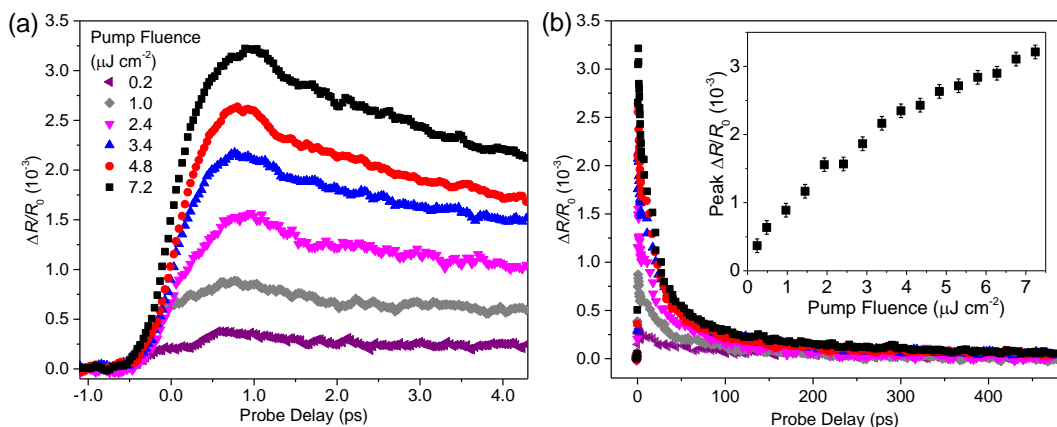

**Fig. ES15** Differential reflectance of a 1.57-eV probe pulse measured from the 3L-WS<sub>2</sub>/3L-MoSe<sub>2</sub> heterostructure with a 2.25-eV pump pulse of various fluences as labeled. (a) and (b) show the signal on short- and long-time ranges, respectively. The inset of (b) shows the linear relation between the peak signal and the pump fluence, which is obtained by choosing the probe delay that produces the maximal signal.
